# Supplementary material
Source: PubMed Central journal article supplement (PMC7687380)

Uncropped Scans

Extended Data Figure 1e

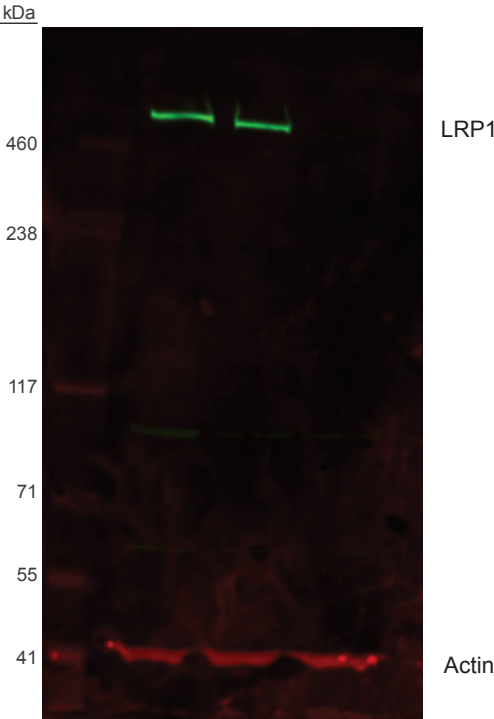

Extended Data Fig 2d

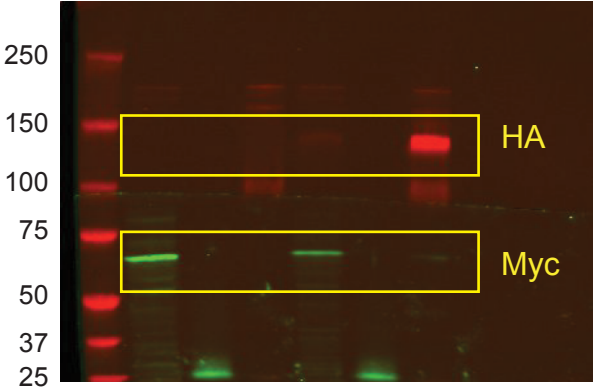

Extended Data Figure 2f

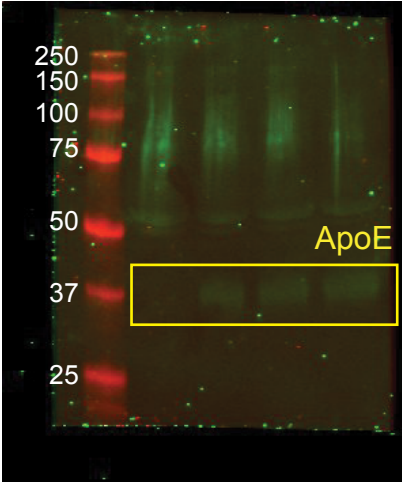

Supplement: NIHMS1568257-supplement-Supplementary_Figure_1.pdf [file NIHMS1568257-supplement-Supplementary_Figure_1.pdf]
